# Supplementary material for: Developing an automatic system for classifying chatter about health services from Twitter: A case study for Medicaid
Source: bioRxiv or medRxiv preprint supplement (doi:10.1101/2020.06.12.20129593), 2020-12-19
Supplement: Supplementary file [file 2020.06.12.20129593-1.pdf]

## **Supplementary Materials for “Developing an automatic pipeline for analyzing chatter about health services from social media: A case study for Medicaid”**

### **Authors:**

\*Yuan-Chi Yang, PhD<sup>1</sup>,  
Mohammed Ali Al-Garadi, PhD<sup>1</sup>,  
Jane M. Zhu, MD, MPP, MSHP<sup>2</sup>,  
David Grande, MD, MPA<sup>3</sup>,  
Whitney Hogg-Bremer, BS<sup>1</sup>  
Abeed Sarker, PhD<sup>1</sup>

<sup>1</sup>Department of Biomedical Informatics, School of Medicine, Emory University, Atlanta, GA, United States;

<sup>2</sup> Division of General Internal Medicine and Geriatrics, Oregon Health & Science University, Portland, OR;

<sup>3</sup> Division of General Internal Medicine and Geriatrics, School of Medicine, University of Pennsylvania, Philadelphia, PA;

\*Corresponding author

Email: [yuan-chi.yang@emory.edu](mailto:yuan-chi.yang@emory.edu)

**Table 1:** List of keywords used for collecting Corpus 1

| Type of keywords                                                 | keywords                                                                                                                                                                                                                                                                                         |
|------------------------------------------------------------------|--------------------------------------------------------------------------------------------------------------------------------------------------------------------------------------------------------------------------------------------------------------------------------------------------|
| Medicaid and its common misspellings                             | medicaid<br>medicade<br>medcaid<br>medicad<br>mediaid<br>mediciad<br>medicaide                                                                                                                                                                                                                   |
| Branded Names of Medicaid Agencies or Managed Care Organizations | firstcare<br>excellusbcb<br>mohealthnet<br>badgercare<br>wellsense<br>medquest<br>denalicare<br>forwardhealth<br>medi-cal<br>mainecare<br>tenncare<br>kancare<br>alamedaalliance<br>hapmichigan<br>ghcsw<br>mywellsense<br>cencalhealth<br>mclarenhlthplan<br>bhpartnershipma<br>vapremierhealth |

**Table 2:** List of handles used for collecting Corpus 2

|                            |                                                                                                                                                                                                                                                                                                                                                                                                                                                                                                                                                                                                                                                                                                                                                                                                                                                                                                                                                                                                                                                                                                                            |
|----------------------------|----------------------------------------------------------------------------------------------------------------------------------------------------------------------------------------------------------------------------------------------------------------------------------------------------------------------------------------------------------------------------------------------------------------------------------------------------------------------------------------------------------------------------------------------------------------------------------------------------------------------------------------------------------------------------------------------------------------------------------------------------------------------------------------------------------------------------------------------------------------------------------------------------------------------------------------------------------------------------------------------------------------------------------------------------------------------------------------------------------------------------|
| Medicaid Agency            | AHCCCSgov, IAHealthLink, MDMedicaid, MassHealth, MSMedicaid, OhioMedicaid, oksoonercare, CCOOregon, scmedicaid, TennCareRep, DVHAVermont, WA_Health_Care, HUSKYHealthCT, GADCH, CHCPF                                                                                                                                                                                                                                                                                                                                                                                                                                                                                                                                                                                                                                                                                                                                                                                                                                                                                                                                      |
| Managed Care Organizations | PSHP, mercycareaz, YamhillCCO, PassportHealthP, SFHealthPlan, AmidaCareNY, AetnaMedicaidNC, magnolia_health, HNEinc, AmeriHealthLA, NetworkHealthWI, UPMCHealthPlan, Medi_CalHCO, ExcellusBCBS, LACareHealth, QuartzBenefits, CoordinatedCare, Buckeye_Health, MVPHealthCare, PartnershipHP, hampmichigan, HPofSanJoaquin, CHCTexas, HSCHealthCare, AnthemBC_News, SunHealthFL, SilverSummitHP, FidelisCare, PriorityHealth, Trilliumchp, HorizonNJHealth, LAHealthConnect, PresHealth, BCBSNM, ECCooperative, HPPlans, RMHP, MHS_Wisconsin, NHPRIHealth, bhpartnershipma, HealthShareOR, VAPremierHealth, IlliniCare, GHCSCW, ucaremn, CFHealthPlans, iCareHealthPlan, _KFHC, MDwiseInc, HSCSN_Inc, CalOptima, SunflowerHPlan, HealthfirstNY, TRUSTEDHP, NextLevelIL, affinityplan, CencalHealth, AbetterGateway, HealthChoiceUT, AmbetterTX, MyWellSense, AlohaCareHawaii, YourCare_Health, CrystalRunHP, HealthChoiceAZ, firstcare, CoCoHealth, BCBSTX, MHSIndiana, UPHealthPlan, MetroPlusHealth, NHhealthy, CDPHP, AskHMSA, myCHPW, McLarenHlthPlan, CAHandW, IEHP_healthcare, BlueCrossMN, setonfamily, BMCHealthNet |

**Table 3:** Classification performances of the classifiers on the test sets of Corpus-1 & 2.

| Classification Algorithm | test set (Corpus-1) | Precision (.XX) |           |    |    |    |    | Recall (.XX) |           |    |    |     |    |
|--------------------------|---------------------|-----------------|-----------|----|----|----|----|--------------|-----------|----|----|-----|----|
|                          |                     | a               | c         | i  | n  | p  | o  | a            | c         | i  | n  | p   | o  |
|                          | NB                  | 17              | 10        | 16 | 54 | 88 | 33 | 9            | 57        | 49 | 60 | 59  | 36 |
|                          | SVM                 | 46              | <b>43</b> | 37 | 73 | 88 | 75 | 31           | <b>70</b> | 47 | 77 | 90  | 34 |
|                          | RF                  | 50              | 60        | 41 | 73 | 81 | 84 | 3            | 24        | 14 | 76 | 94  | 32 |
|                          | KNN                 | 0               | 35        | 16 | 48 | 89 | 17 | 0            | 22        | 6  | 65 | 53  | 64 |
|                          | NN                  | 21              | 36        | 19 | 70 | 87 | 46 | 14           | 46        | 29 | 71 | 84  | 46 |
|                          | BLSTM               | 0               | 50        | 34 | 71 | 85 | 78 | 0            | 57        | 29 | 79 | 91  | 39 |
|                          | BERT                | 59              | <b>55</b> | 46 | 79 | 92 | 78 | 49           | <b>73</b> | 61 | 86 | 91  | 46 |
|                          | test set (Corpus-2) | Precision (.XX) |           |    |    |    |    | Recall (.XX) |           |    |    |     |    |
|                          |                     | a               | c         | i  | n  | p  | o  | a            | c         | i  | n  | p   | o  |
|                          | NB                  | 0               | 67        | 14 | 15 | 0  | 60 | 0            | 82        | 47 | 33 | 0   | 11 |
|                          | SVM                 | 100             | <b>79</b> | 64 | 43 | 0  | 78 | 33           | <b>91</b> | 41 | 50 | 0   | 78 |
|                          | RF                  | 0               | 79        | 0  | 67 | 8  | 67 | 0            | 83        | 0  | 33 | 14  | 78 |
| KNN                      | 0                   | 92              | 0         | 0  | 0  | 43 | 0  | 13           | 0         | 0  | 0  | 100 |    |
| NN                       | 100                 | 79              | 43        | 25 | 4  | 75 | 33 | 70           | 53        | 17 | 14 | 68  |    |
| LSTM                     | 0                   | 79              | 57        | 71 | 14 | 76 | 0  | 75           | 24        | 83 | 71 | 65  |    |
| BERT                     | 100                 | <b>92</b>       | 93        | 40 | 33 | 93 | 67 | <b>92</b>    | 76        | 67 | 57 | 87  |    |

**Table 4:** The 10 highest-ranking TFIDF bigrams and trigrams in each class

| <b>Class</b> | <b>bigrams</b>                                                                                                                                                                                                | <b>trigrams</b>                                                                                                                                                                                                                                                                                 |
|--------------|---------------------------------------------------------------------------------------------------------------------------------------------------------------------------------------------------------------|-------------------------------------------------------------------------------------------------------------------------------------------------------------------------------------------------------------------------------------------------------------------------------------------------|
| a            | <p>study finds<br/>work requirements<br/>study says<br/>study shows<br/>states expanded<br/>health care<br/>affordable care<br/>low income<br/>expansion tied<br/>health insurance</p>                        | <p>deaths every state<br/>study could averted<br/>every state expanded<br/>could averted deaths<br/>heart related deaths<br/>fewer heart related<br/>tied fewer heart<br/>expansion tied fewer<br/>data show failing<br/>show failing expand</p>                                                |
| c            | <p>health insurance<br/>food stamps<br/>private insurance<br/>health care<br/>social security<br/>make much<br/>doesn cover<br/>nursing home<br/>mental health<br/>full time</p>                              | <p>long term care<br/>make much money<br/>work full time<br/>afford health insurance<br/>blue cross blue<br/>cross blue shield<br/>mental health care<br/>pre existing conditions<br/>social security disability<br/>pre existing condition</p>                                                 |
| i            | <p>centers services<br/>long term<br/>managed care<br/>health care<br/>term care<br/>health insurance<br/>nursing home<br/>mental health<br/>home care<br/>behavioral health</p>                              | <p>long term care<br/>critical carecoordination model<br/>carecoordination model elements<br/>managed care members<br/>model elements managed<br/>elements managed care<br/>protect family assets<br/>assets devastating nursing<br/>devastating nursing home<br/>family assets devastating</p> |
| n            | <p>work requirements<br/>health care<br/>trump administration<br/>judge blocks<br/>social security<br/>federal judge<br/>managed care<br/>requirements kentucky<br/>security budget<br/>kentucky arkansas</p> | <p>work requirements kentucky<br/>requirements kentucky arkansas<br/>social security budget<br/>trump said wouldn<br/>wouldn social security<br/>said wouldn social<br/>security budget cuts<br/>judge blocks work<br/>judge strikes work<br/>voter approved expansion</p>                      |
| p            | <p>social security<br/>food stamps<br/>health care<br/>health insurance<br/>cuts social<br/>private insurance</p>                                                                                             | <p>cuts social security<br/>pre existing conditions<br/>billion social security<br/>cutting social security<br/>social security cuts<br/>welfare food stamps</p>                                                                                                                                |

|  |                                                                  |                                                                                                        |
|--|------------------------------------------------------------------|--------------------------------------------------------------------------------------------------------|
|  | trump budget<br>pre existing<br>existing conditions<br>take away | trillion billion billion<br>social security public<br>billion billion social<br>social security budget |
|--|------------------------------------------------------------------|--------------------------------------------------------------------------------------------------------|
